# Supplementary material for: PET/PDT theranostics: synthesis and biological evaluation of a peptide-targeted gallium porphyrin
Source: Royal Society of Chemistry journal article supplement (doi:10.1039/c4dt02949f), 2014-11-19
Supplement: c4dt02949f1.pdf [file c4dt02949f1.pdf]

# PET/PDT Theranostics: Synthesis and Biological Evaluation of a Peptide-Targeted Gallium Porphyrin

F. Bryden<sup>a</sup>, H. Savoie<sup>a</sup>, E.V. Rosca<sup>b</sup>, R.W. Boyle<sup>a</sup>

## Table of Contents

| <b>Contents</b>                                 | <b>Page</b> |
|-------------------------------------------------|-------------|
| Synthesis and NMR data for compounds <b>3-6</b> | 2-5         |

**5-[4-Azidophenyl]-10,15,20-tri-(*N*-methyl-4-pyridinium)porphyrinato gallium (III) trichloride **3****

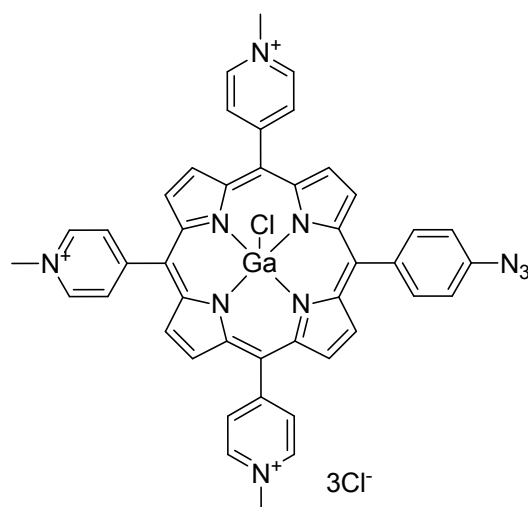

To a microwave tube was added porphyrin **1** (10 mg, 0.012 mmol) and water (5 ml). Gallium (III) chloride (10 mg, 0.06 mmol) was added and the mixture heated to 110°C (100W, MW) for 5 minutes. The mixture was neutralised with saturated sodium bicarbonate, and ammonium hexafluorophosphate added. The precipitated product was collected by filtration and redissolved in acetone. Tetrabutylammonium chloride was added and the precipitated product was collected by filtration. The product was precipitated from diethyl ether over methanol to yield the product as a red-purple solid (10 mg, 91%). UV-Vis (H<sub>2</sub>O):  $\lambda_{\max}$  (log  $\epsilon$ ) 426 (5.51), 556, 597. <sup>1</sup>H-NMR (400 MHz, D<sub>2</sub>O):  $\delta$  4.65 (under water peak, s, 9H, N-CH<sub>3</sub>), 7.44 (s, 2H, 5-m-Ph), 8.17 (s, 2H, 5-o-Ph), 8.84 (s, 6H, 10,15,20-o-Py), 8.97-9.34 (m, 14H, 10,15,20-m-Py,  $\beta$ H). <sup>13</sup>C-NMR (100.5 MHz, D<sub>2</sub>O):  $\delta$  48.2 (C-CH<sub>3</sub>), 114.1, 114.9, 117.7, 131.7, 132.4, 132.6, 133.0 ( $\beta$ -C), 134.5, 136.0, 143.9 ( $\beta$ -C), 146.2, 146.6, 149.1, 157.9. MS: (ESI) m/z 402 (100[M - 3Cl]<sup>2+</sup>), HRMS: calcd. for C<sub>44</sub>H<sub>32</sub>ClGa<sub>10</sub> [M - 3Cl]<sup>2+</sup>: 402.0872 observed 402.0881.

**5-[4-2-(2-(2-Azidoethoxy)ethoxy)ethanaminocarbonyl]phenyl]-10,15,20-tris(1-methylpyridinium-4-yl)porphyrinato gallium (III) trichloride 4**

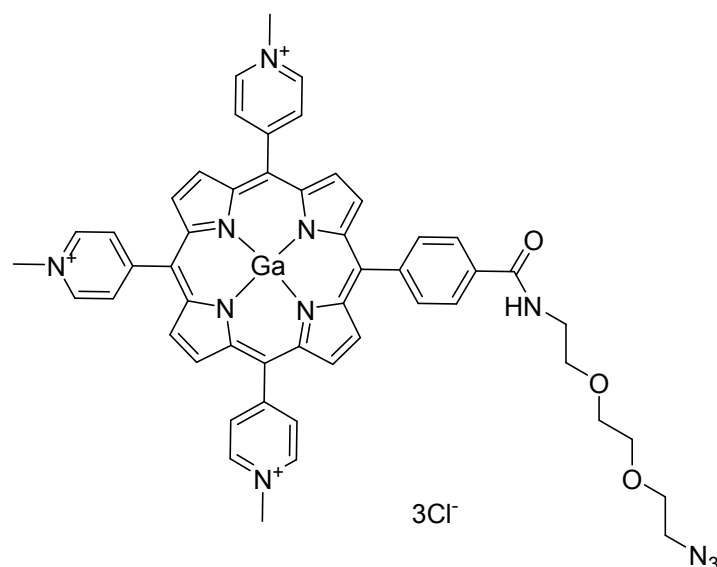

To a microwave tube was added porphyrin **2** (12 mg, 0.012 mmol) and water (5 ml). Gallium (III) chloride (10 mg, 0.06 mmol) was added and the mixture heated to 110°C (100W, MW) for 5 minutes. The mixture was neutralised with saturated sodium bicarbonate, and ammonium hexafluorophosphate added. The precipitated product was collected by filtration and redissolved in acetone. Tetrabutylammonium chloride was added and the precipitated product was collected by filtration. The product was precipitated from diethyl ether over methanol to yield the product as a red-purple solid (12 mg, 93%). UV-Vis: (H<sub>2</sub>O)  $\lambda_{\max}$  (log  $\epsilon$ ): 430 (5.24), 559, 601. <sup>1</sup>H-NMR (400 MHz, DMSO-d<sub>6</sub>):  $\delta$  3.40-3.45 (m, 2H, CH<sub>2</sub>N<sub>3</sub>), 3.71-3.87 (m, 10H, OCH<sub>2</sub>), 4.84 (s, 9H, N-CH<sub>3</sub>), 8.33-8.44 (m, 4H, 5-o,m-Ar), 8.97-9.07 (m, 6H, 10,15,20-o-Ar), 9.32-9.50 (m, 14H, 10,15,20-m-Ar and  $\beta$ -H). <sup>13</sup>C-NMR: (100.5 MHz, DMSO-d<sub>6</sub>)  $\delta$ : 50.6 (CH<sub>3</sub>), 69.4, 70.0, 70.2, 70.3, 126.0, 132.1, 132.8 ( $\beta$ -C), 133.0, 134.4, 144.4 ( $\beta$ -C), 146.8, 147.1, 149.0, 157.6. MS: (ESI) m/z 481 (100[M - 2Cl-H]<sup>2+</sup>), HRMS: calcd. for C<sub>51</sub>H<sub>45</sub>ClGaO<sub>3</sub>N<sub>10</sub> [M - 2Cl-H]<sup>2+</sup>: 481.6320 observed 481.6313.

## Gallium-peptide conjugate 5

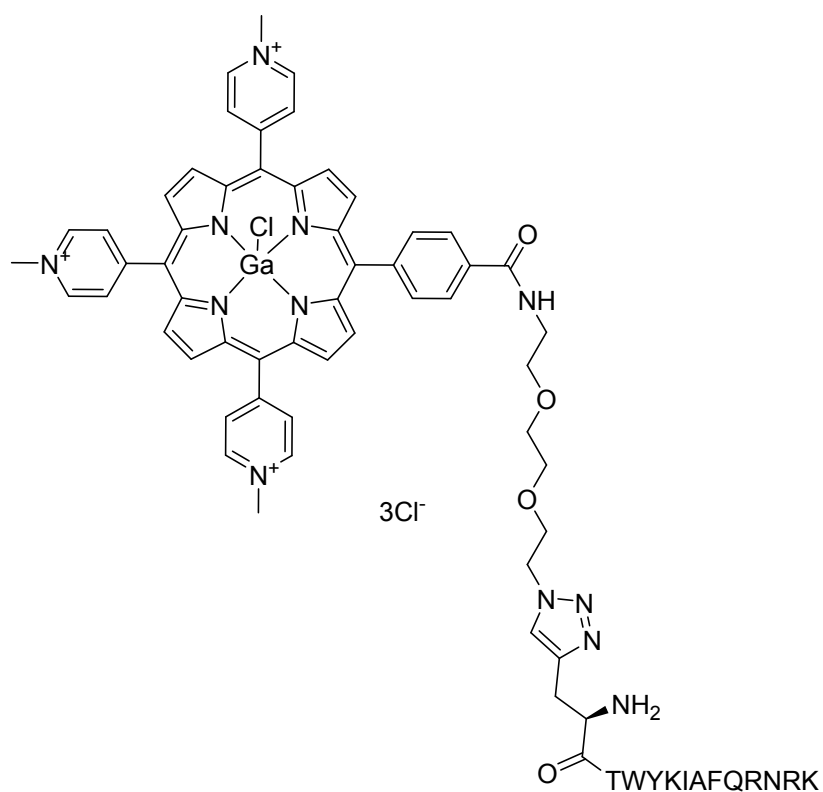

To a stirred solution of gallium porphyrin **4** (2 mg, 2.0  $\mu\text{mol}$ ) in water (1 ml) was added THPTA (174  $\mu\text{g}$ , 0.4  $\mu\text{mol}$ ), aminoguanidine bicarbonate (54  $\mu\text{g}$ , 0.4  $\mu\text{mol}$ ), copper (II) sulfate pentahydrate (50  $\mu\text{g}$ , 0.2  $\mu\text{mol}$ ) and sodium ascorbate (80  $\mu\text{g}$ , 0.4  $\mu\text{mol}$ ) in water (0.2 ml). The dodecapeptide (2 mg, 1.7  $\mu\text{mol}$ ) in water (2 ml) was added and the mixture stirred at rt for 1 hour. The crude was purified on a column of Sephadex G-15, and lyophilised to remove water, to isolate the product as a pale green powder.  $R_f$ : 8.40 min. MS: (MALDI)  $m/z$  2635.2 (100[M - 4Cl]<sup>+</sup>).

## Control conjugate 6

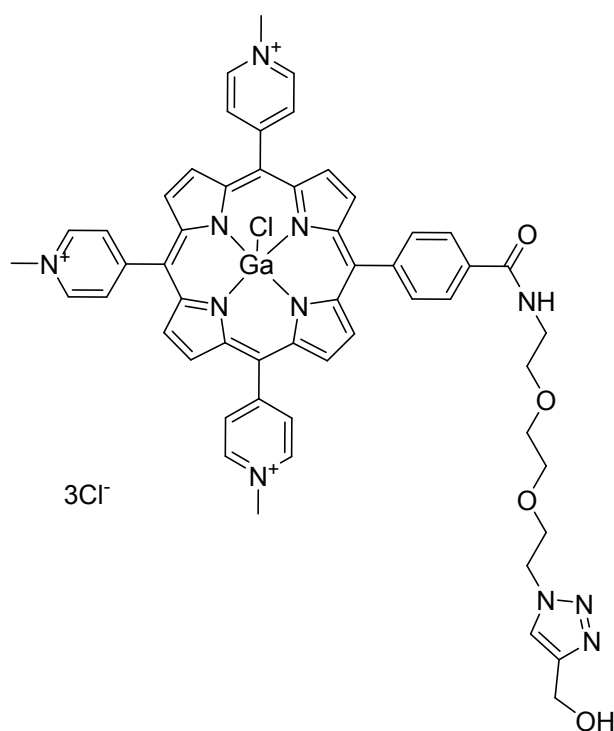

To a microwave tube containing gallium porphyrin **4** (10 mg, 10.0  $\mu\text{mol}$ ) in water (6 ml) was added THPTA (174  $\mu\text{g}$ , 0.4  $\mu\text{mol}$ ), aminoguanidine bicarbonate (54  $\mu\text{g}$ , 0.4  $\mu\text{mol}$ ), and copper (II) sulfate pentahydrate (50  $\mu\text{g}$ , 0.2  $\mu\text{mol}$ ) and sodium ascorbate (80  $\mu\text{g}$ , 0.4  $\mu\text{mol}$ ) in water (0.2 ml). Propargyl alcohol (100  $\mu\text{l}$ , MOL) in THF (1 ml) was added, and the mixture heated to 45°C for 1 hour (100 W, MW). The solvent was removed under reduced pressure and ammonium hexafluorophosphate added. The precipitated product was collected by filtration and redissolved in acetone. Tetrabutylammonium chloride was added and the precipitated product was collected by filtration. The product was precipitated from diethyl ether over methanol to yield the product as a red-purple solid (12 mg, 93%). UV-Vis: ( $\text{H}_2\text{O}$ )  $\lambda_{\text{max}}$  (log  $\epsilon$ ): 430 (5.22), 560, 601.  $^1\text{H-NMR}$  (400 MHz,  $\text{DMSO-d}_6$ ):  $\delta$  3.55-3.73 (m, 10H,  $\text{OCH}_2$ ), 3.85-3.91 (m, 2H,  $\text{CH}_2\text{N}_3$ ), 4.52-4.58 (m, 4H,  $\text{CH}_2\text{NH}_2$  and  $\text{CH}_2\text{OH}$ ), 4.72 (s, 9H, N- $\text{CH}_3$ ), 8.01 (s, 1H, triazole H), 8.23-8.36 (m, 4H, 5-o,m-Ar), 8.85-9.05 (m, 14H, 10,15,20-o-Ar and  $\beta$ -H), 9.36-9.48 (m, 6H, 10,15,20-m-Ar).  $^{13}\text{C-NMR}$ : (100.5 MHz,  $\text{DMSO-d}_6$ )  $\delta$ : 48.2 ( $\underline{\text{C}}\text{H}_3$ ), 49.9 ( $\underline{\text{C}}\text{H}_2$ ), 55.9, 65.5, 69.4, 69.6, 70.0, 70.1, 70.2, 75.4, 115.4, 116.1, 122.8, 123.6, 132.2, 132.7 ( $\beta$ -C), 134.6, 144.2 ( $\beta$ -C), 145.4, 148.2, 148.7, 148.9, 150.5, 159.0, 166.8 (C=O). MS: (ESI)  $m/z$  334 ( $100[\text{M} - 4\text{Cl} + \text{OH}]^{3+}$ ), HRMS: calcd. for  $\text{C}_{54}\text{H}_{51}\text{GaO}_5\text{N}_{11}$   $[\text{M} - 4\text{Cl} + \text{OH}]^{3+}$ : 334.1110 observed 334.1107.
